# Supplementary material for: Effectiveness of the CoronaVac vaccine in older adults during a gamma variant associated epidemic of covid-19 in Brazil: test negative case-control study
Source: PubMed Central journal article supplement — BMJ. 2021 Aug 20;374:n2015. doi: 10.1136/bmj.n2015 (PMC8377801; doi:10.1136/bmj.n2015), 2021-08-20
Supplement: croj067370.ww1.pdf [file croj067370.ww1.pdf]

## Supplementary appendix

**Supplement to:** Effectiveness of the CoronaVac vaccine in older adults population during a Gamma variant-associated epidemic of COVID-19 in Brazil: test-negative case-control study

### Table of Contents

|                                                                                                                                                                                                                                                       |           |
|-------------------------------------------------------------------------------------------------------------------------------------------------------------------------------------------------------------------------------------------------------|-----------|
| <b>Supplementary Table 1. Data sources description .....</b>                                                                                                                                                                                          | <b>3</b>  |
| <b>Supplementary Figure 1. Daily cases of COVID-19 and cumulative vaccination coverage from Oct 01, 2020 to Apr 29, 2021 in São Paulo State, Brazil.....</b>                                                                                          | <b>4</b>  |
| <b>Supplementary Figure 2. Timing of enrolment of case-control sets with discordant cases and controls by vaccination category.....</b>                                                                                                               | <b>5</b>  |
| <b>Supplementary Figure 3. Timing of RT-PCR sample collection date relative to first (left column) and second (right column) vaccine dose date, among cases (top row) and controls (bottom row) who were vaccinated during the study period. ....</b> | <b>6</b>  |
| <b>Supplementary Table 2. Distribution of matched case-control sets with discordant case and control vaccine status. ....</b>                                                                                                                         | <b>7</b>  |
| <b>Supplementary Table 3. Characteristics of adults <math>\geq 70</math> years of age who were eligible for matching and selected into case-test negative pairs for the hospitalisation analysis. ....</b>                                            | <b>8</b>  |
| <b>Supplementary Table 4. Characteristics of adults <math>\geq 70</math> years of age who were eligible for matching and selected into case-test negative pairs for the death analysis. ....</b>                                                      | <b>10</b> |
| <b>Supplementary Table 5. Sensitivity analysis for the bias indicator period expanding from 0-13 days to 0-6 and 7-13 days after first dose.....</b>                                                                                                  | <b>12</b> |
| <b>Supplementary Table 6. Adjusted effectiveness of CoronaVac during the period <math>\geq 14</math> days after the second CoronaVac dose for subgroups of adults <math>\geq 70</math> years of age. ....</b>                                         | <b>13</b> |
| <b>Supplementary Table 7. Adjusted effectiveness of CoronaVac against symptomatic COVID-19 <math>\geq 14</math> days after the second dose, in subgroups of adults <math>\geq 70</math> years of age. ....</b>                                        | <b>14</b> |
| <b>Supplementary Figure 4. Adjusted effectiveness of CoronaVac against symptomatic COVID-19 <math>\geq 14</math> days after the second CoronaVac dose for other subgroups of adults <math>\geq 70</math> years of age. .</b>                          | <b>15</b> |
| <b>Supplementary Table 8. Detailed description of effectiveness of CoronaVac against the composite outcome hospitalisations or deaths in adults <math>\geq 70</math> years of age .....</b>                                                           | <b>16</b> |
| <b>Supplementary Table 9. General characteristics of the matched sample according to main and sensitivity analyses. ....</b>                                                                                                                          | <b>17</b> |
| <b>Supplementary Table 10. Summary of effectiveness of CoronaVac against symptomatic COVID-19 of the main analysis and three sensitivity analyses for the matching procedure ...</b>                                                                  | <b>19</b> |

|                                                                                                                                                                                                                                                                                                                             |           |
|-----------------------------------------------------------------------------------------------------------------------------------------------------------------------------------------------------------------------------------------------------------------------------------------------------------------------------|-----------|
| <b>Supplementary Table 11. Detailed description of effectiveness of CoronaVac against symptomatic COVID-19, hospitalisations and deaths in adults <math>\geq 70</math> years of age in the Sensitivity Analysis 1, 1:1 without replacement.....</b>                                                                         | <b>20</b> |
| <b>Supplementary Table 12. Detailed description of effectiveness of CoronaVac against symptomatic COVID-19, hospitalisations and deaths in adults <math>\geq 70</math> years of age in the Sensitivity Analysis 2, 1:1 with replacement.....</b>                                                                            | <b>21</b> |
| <b>Supplementary Table 13. Detailed description of effectiveness of CoronaVac against symptomatic COVID-19, hospitalisations and deaths in adults <math>\geq 70</math> years of age in the Sensitivity Analysis 3, with replacement and 1:2 case-controls .....</b>                                                         | <b>22</b> |
| <b>Supplementary Table 14. Adjusted effectiveness of CoronaVac during the period <math>\geq 14</math> days after the second CoronaVac dose for subgroups of adults <math>\geq 70</math> years of age in the Sensitivity Analysis 1, without replacement and 1:1 case-controls (original analysis in the protocol) .....</b> | <b>23</b> |
| <b>Supplementary Table 15. Adjusted effectiveness of CoronaVac during the period <math>\geq 14</math> days after the second CoronaVac dose for subgroups of adults <math>\geq 70</math> years of age in the Sensitivity Analysis 1, with replacement and 1:1 case-controls .....</b>                                        | <b>24</b> |
| <b>Supplementary Table 16. Adjusted effectiveness of CoronaVac during the period <math>\geq 14</math> days after the second CoronaVac dose for subgroups of adults <math>\geq 70</math> years of age in the Sensitivity Analysis 2, with replacement and 1:2 case-controls .....</b>                                        | <b>25</b> |

Supplementary Table 1. **Data sources description**

| <b>Database acronym</b>                                                     | <b>Domain</b>                                                                                              | <b>Comment</b>                                                                                                                                                                                                                   |
|-----------------------------------------------------------------------------|------------------------------------------------------------------------------------------------------------|----------------------------------------------------------------------------------------------------------------------------------------------------------------------------------------------------------------------------------|
| “Vacina Já”                                                                 | State COVID-19 vaccination registry                                                                        | The state vaccination system transfers the data daily to the National Immunization System (SIPNI)                                                                                                                                |
| SIVEP-Gripe (“Sistema de Informação da Vigilância Epidemiológica da Gripe”) | National surveillance database of severe acute respiratory illnesses                                       | Contains all COVID-19 suspected or confirmed hospitalizations and deaths. In São Paulo State, there is a protocol for RT-PCR post-mortem SARS-CoV-2 testing for suspected COVID-19 deaths that are also notified to SIVEP-Gripe. |
| e-SUS                                                                       | National surveillance system of suspected cases of COVID-19 from mild to moderate “influenza like illness” | Notifications from primary health care and specialty outpatient visits.                                                                                                                                                          |
| GAL (“Gerenciador de Ambiente Laboratorial”)                                | State laboratory testing registry of the network of public health laboratories                             | In São Paulo State, diagnostic tests performed in GAL is already imputed in eSUS-VE or SIVEP-Gripe, increasing the coverage of e-SUS and SIVEP-Gripe                                                                             |

### Supplementary Figure 1. Daily cases of COVID-19 and cumulative vaccination coverage from Oct 01, 2020 to Apr 29, 2021 in São Paulo State, Brazil

Panel A shows the daily cases of reported COVID-19 from Oct 01, 2020 to Apr 29, 2021 in São Paulo State, Brazil, with the green line representing the 14-day rolling average of counts. Panels B, C and D show the cumulative vaccination coverage for age groups  $>90y$ ,  $80y-89y$ , and  $70y-79y$ , respectively. Population estimates for age groups were obtained from national projections for 2020. Vertical bars, from left to right in each panel, show the dates that adults  $\geq 90$ ,  $80-89$  and  $70-79$  years of age in the general population became eligible for vaccination.

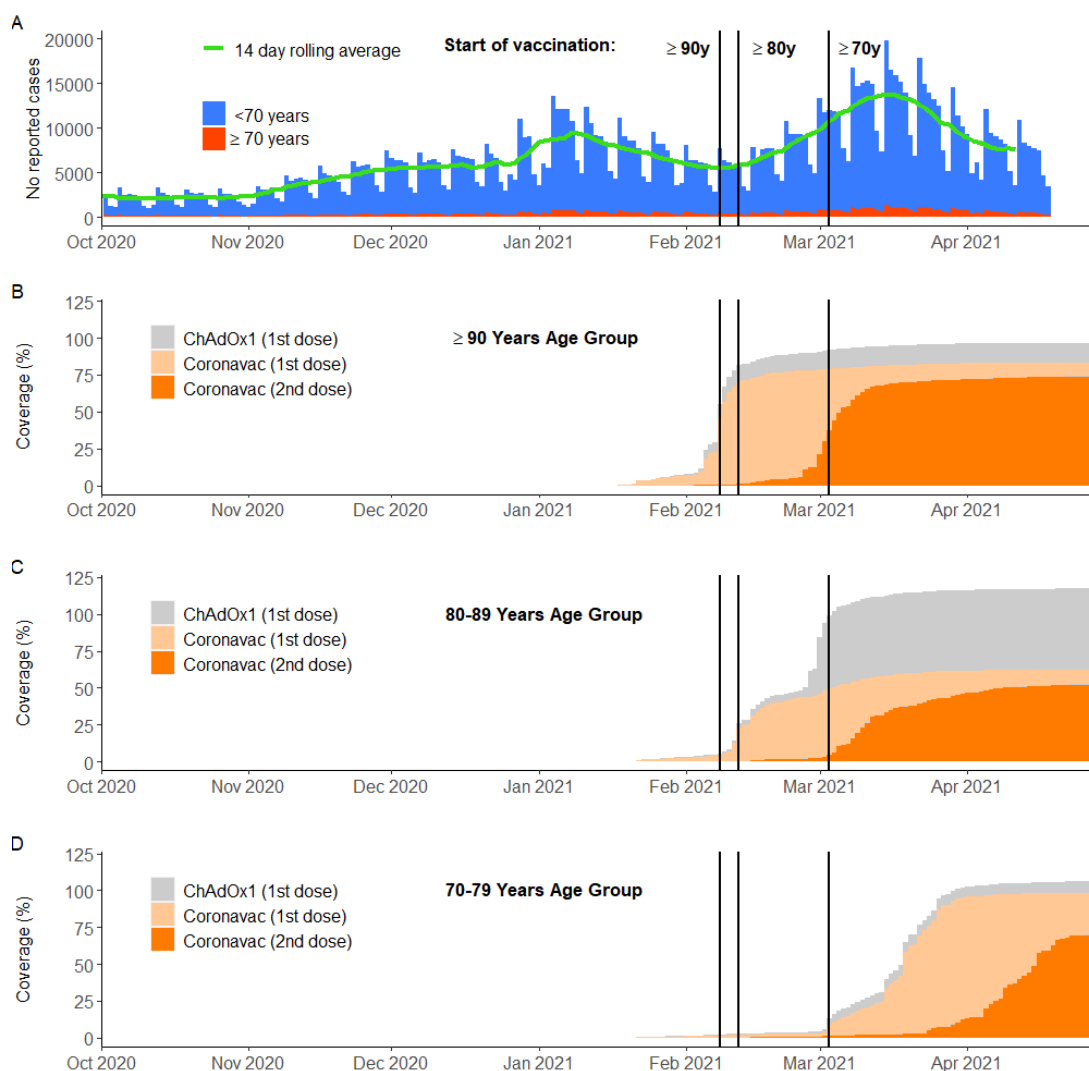

Supplementary Figure 2. **Timing of enrolment of case-control sets with discordant cases and controls by vaccination category**

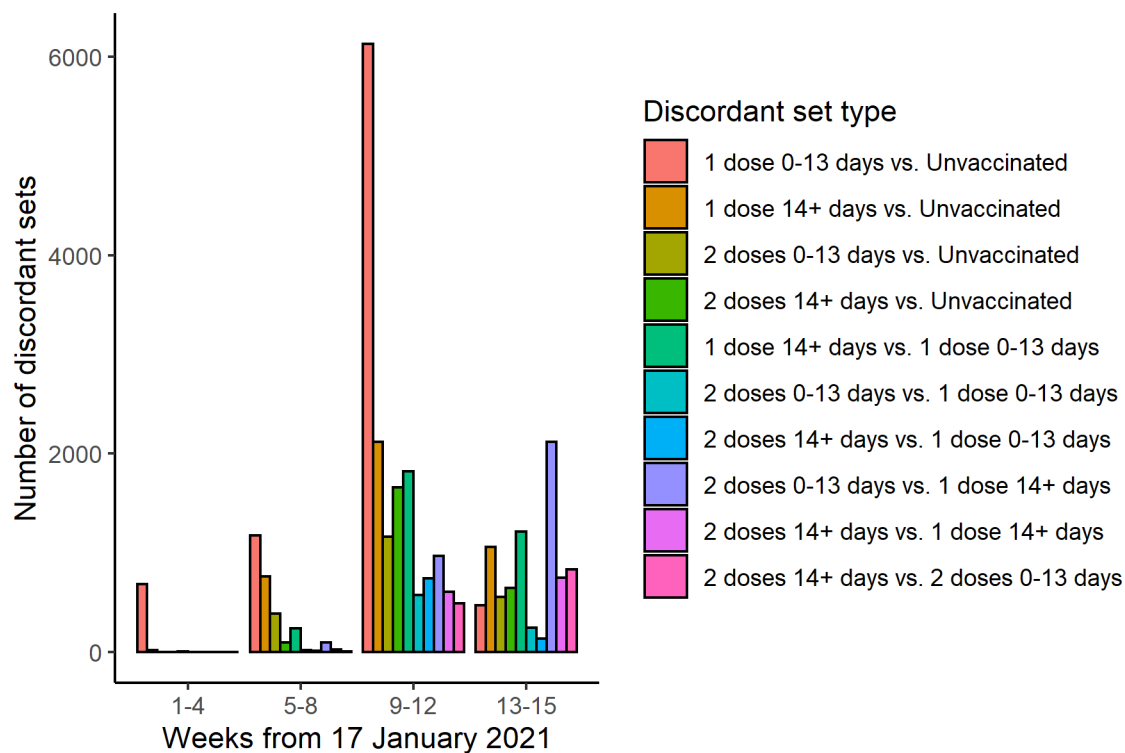

Supplementary Figure 3. **Timing of RT-PCR sample collection date relative to first (left column) and second (right column) vaccine dose date, among cases (top row) and controls (bottom row) who were vaccinated during the study period.**

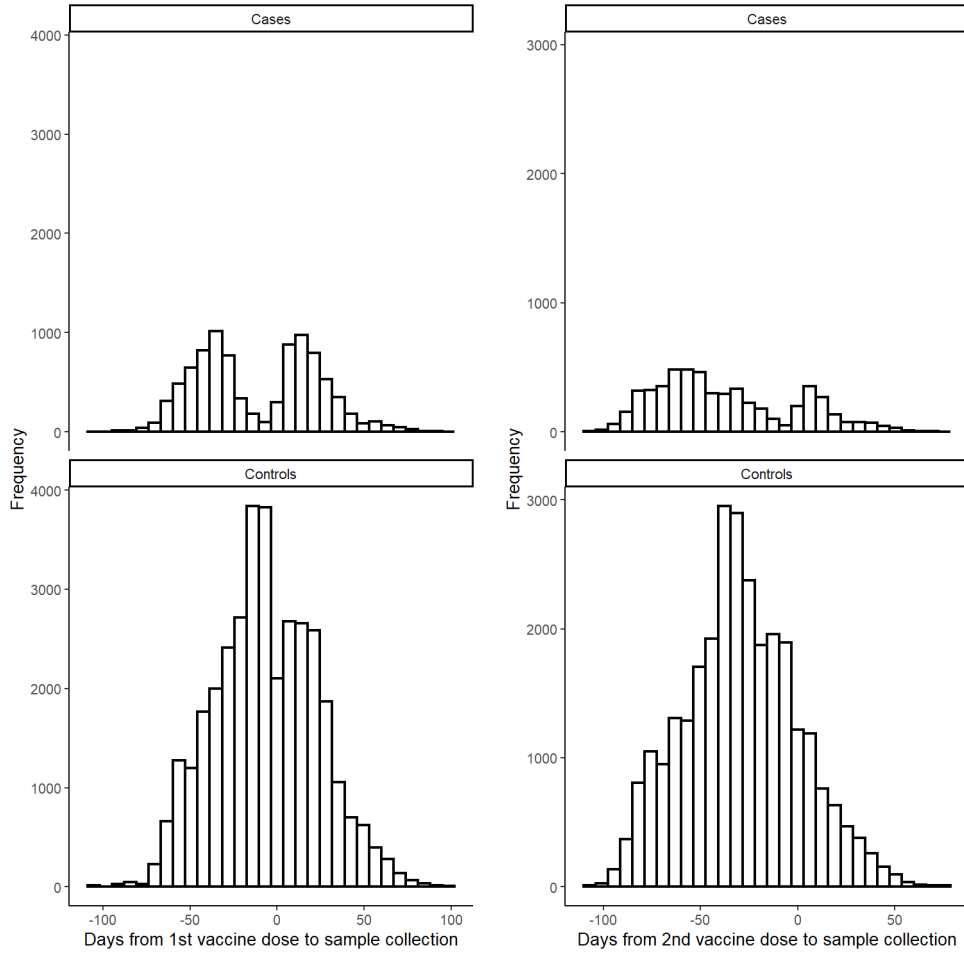

Supplementary Table 2. **Distribution of matched case-control sets with discordant case and control vaccine status.**

| Vaccine status of at least one control in matched set | Case vaccine status |                                      |                                    |                                    |                                  |
|-------------------------------------------------------|---------------------|--------------------------------------|------------------------------------|------------------------------------|----------------------------------|
|                                                       | Unvaccinated        | Single dose, dose 1 within 0-13 days | Single dose, dose 1 $\geq$ 14 days | Two doses, dose 2 within 0-13 days | Two doses, dose 2 $\geq$ 14 days |
| Unvaccinated                                          | 8,370               | 996                                  | 587                                | 232                                | 190                              |
| Single dose, dose 1 within 0-13 days                  | 1,320               | 1,036                                | 476                                | 74                                 | 39                               |
| Single dose, dose 1 $\geq$ 14 days                    | 635                 | 521                                  | 1,029                              | 383                                | 185                              |
| Two doses dose 2 within 0-13 days                     | 339                 | 158                                  | 502                                | 440                                | 158                              |
| Two doses, dose 2 $\geq$ 14 days                      | 407                 | 152                                  | 224                                | 232                                | 412                              |

Supplementary Table 3. **Characteristics of adults  $\geq 70$  years of age who were eligible for matching and selected into case-test negative pairs for the hospitalisation analysis.**

| Characteristics*                                        | Eligible cases and controls  |                              | Matched pairs           |                     |
|---------------------------------------------------------|------------------------------|------------------------------|-------------------------|---------------------|
|                                                         | Test-negative<br>(n=17,622)^ | Test-positive<br>(n=26,433)^ | Controls<br>(n=23,265)^ | Cases<br>(n=7,043)^ |
| <b>Demographics</b>                                     |                              |                              |                         |                     |
| Age, mean (SD), years                                   | 77.53 (6.78)                 | 76.71 (6.19)                 | 76.47 (5.87)            | 76.83 (6.12)        |
| Age categories, n (%)                                   |                              |                              |                         |                     |
| 70-79 years                                             | 12,123 (68.8)                | 19,673 (74.4)                | 17639 (75.8)            | 5191 (73.7)         |
| 80-89 years                                             | 4,301 (24.4)                 | 5,437 (20.6)                 | 4801 (20.6)             | 1519 (21.6)         |
| $\geq 90$ years                                         | 1,198 (6.8)                  | 1,323 (5.0)                  | 825 (3.5)               | 333 (4.7)           |
| Male sex, n (%)                                         | 7,689 (43.6)                 | 12,431 (47.0)                | 10972 (47.2)            | 3380 (48.0)         |
| Self-reported race <sup>†</sup> , n (%)                 |                              |                              |                         |                     |
| White/Branca                                            | 13,415 (76.1)                | 19,796 (74.9)                | 19251 (82.7)            | 5742 (81.5)         |
| Brown/Pardo                                             | 3,192 (18.1)                 | 4,983 (18.9)                 | 3530 (15.2)             | 1077 (15.3)         |
| Black/Preta                                             | 785 (4.5)                    | 1,258 (4.8)                  | 404 (1.7)               | 165 (2.3)           |
| Yellow/ Amarela                                         | 226 (1.3)                    | 390 (1.5)                    | 80 (0.3)                | 59 (0.8)            |
| Indigenous/Indigena                                     | 4 (0.0)                      | 6 (0.0)                      | -                       | -                   |
| Residence in "Grande São Paulo"<br>Health Region, n (%) | 12,381 (70.3)                | 16,538 (62.6)                | 6166 (26.5)             | 2613 (37.1)         |
| <b>Comorbidities</b>                                    |                              |                              |                         |                     |
| Reported number <sup>‡</sup> , n (%)                    |                              |                              |                         |                     |
| None                                                    | 10,027 (56.9)                | 12,668 (47.9)                | 12948 (55.7)            | 1986 (28.2)         |
| One or two                                              | 6,984 (39.6)                 | 12,548 (47.5)                | 9375 (40.3)             | 4461 (63.3)         |
| Three or more                                           | 611 (3.5)                    | 1,217 (4.6)                  | 942 (4.0)               | 596 (8.5)           |
| Cardiovascular disease, n (%)                           | 5,293 (30.0)                 | 10,079 (38.1)                | 7035 (30.2)             | 3813 (54.1)         |
| Diabetes, n (%)                                         | 3,233 (18.3)                 | 6,533 (24.7)                 | 4525 (19.4)             | 2508 (35.6)         |
| <b>Prior SARS-CoV-2 exposure</b> **                     |                              |                              |                         |                     |



|                                                                             |                     |                      |                     |                    |
|-----------------------------------------------------------------------------|---------------------|----------------------|---------------------|--------------------|
| Previous symptomatic events notified to the surveillance systems**, n (%)   | 685 (3.9)           | 354 (1.3)            | 18 (0.1)            | 15 (0.2)           |
| Positive SARS-CoV-2 test result <sup>††</sup> , n (%)                       | 66 (0.4)            | 13 (0.0)             | 0 (0.0)             | 2 (0.0)            |
| Interval between symptoms onset and RT-PCR testing, median (p25-p75), days  | 3 [2-5]             | 4 [2-6]              | 3 [1-5]             | 4 [2-6]            |
| <b>Hospitalisations, n (%)</b>                                              | 4,524/17,484 (25.9) | 12,987/26,221 (49.5) | 6,767/23,148 (29.2) | 7,043/7,043 (100)  |
| <b>Deaths, n (%)</b>                                                        | 1,594/16,710 (9.5)  | 7,054/24,508 (28.8)  | 2,527/21,915 (11.5) | 3,369/6,057 (55.6) |
| Interval between symptoms onset and hospitalization, median (p25-p75), days | 3 [2-6]             | 7 [4-10]             | 4 [2-7]             | 7 [4-10]           |
| Interval between symptoms onset and deaths, median (p25-p75), days          | 8 [4-13]            | 14 [9-21]            | 8 [4-16]            | 16 [10-22]         |
| <b>Vaccination status</b>                                                   |                     |                      |                     |                    |
| Not vaccinated, n (%)                                                       | 11,986 (68.0)       | 17,233 (65.2)        | 14583 (62.7)        | 4583 (65.1)        |
| Single dose, within 0-13 days, n (%)                                        | 1,446 (8.2)         | 2,976 (11.3)         | 2926 (12.6)         | 897 (12.7)         |
| Single dose, ≥14 days, n (%)                                                | 1,797 (10.2)        | 3,312 (12.5)         | 2723 (11.7)         | 855 (12.1)         |
| Two doses, within 0-13 days, n (%)                                          | 1,041 (5.9)         | 1,533 (5.8)          | 1449 (6.2)          | 361 (5.1)          |
| Two doses, ≥14 days, n (%)                                                  | 1,352 (7.7)         | 1,379 (5.2)          | 1584 (6.8)          | 347 (4.9)          |
| Interval between first and second dose, mean (SD), days                     | 25 (6)              | 30 (12)              | 25 (7)              | 29 (12)            |
| Interval between first dose and RT-PCR testing, mean (SD), days             | 28 (19)             | 23 (16)              | 23 (17)             | 22 (17)            |
| Interval between second dose and RT-PCR testing, mean (SD), days            | 20 (15)             | 17 (14)              | 18 (15)             | 18 (15)            |

\*Continuous variables are displayed as mean (SD); categorical variables are displayed as n (%).

^These numbers refer to RT-PCR tests and represent 43,774 individuals for the eligible cases and controls and 13,716 individuals in the matched cases and controls.

†Race/skin colour as defined by the Brazilian national census bureau (Instituto Nacional de Geografia e Estatísticas).

‡Comorbidities included: cardiovascular, renal, neurological, haematological, or hepatic comorbidities, diabetes, chronic respiratory disorder, obesity, or immunosuppression.

\*\*Prior to the start of the study on 17 January, 2021 and after systematic surveillance was implemented on 1 February, 2020.

\*\* Reported illness with COVID-19 associated symptoms in the eSUS and SIVEP-Gripe databases.

†† Defined as a positive SARS-CoV-2 RT-PCR or antigen detection test result.

Supplementary Table 4. **Characteristics of adults  $\geq 70$  years of age who were eligible for matching and selected into case-test negative pairs for the death analysis.**

| Characteristics*                                        | Eligible cases and controls  |                              | Matched pairs           |                     |
|---------------------------------------------------------|------------------------------|------------------------------|-------------------------|---------------------|
|                                                         | Test-negative<br>(n=17,622)^ | Test-positive<br>(n=26,433)^ | Controls<br>(n=11,075)^ | Cases<br>(n=3,549)^ |
| <b>Demographics</b>                                     |                              |                              |                         |                     |
| Age, mean (SD), years                                   | 77.53 (6.78)                 | 76.71 (6.19)                 | 76.91 (6.06)            | 77.31 (6.29)        |
| Age categories, n (%)                                   |                              |                              |                         |                     |
| 70-79 years                                             | 12,123 (68.8)                | 19,673 (74.4)                | 8079 (72.9)             | 2522 (71.1)         |
| 80-89 years                                             | 4,301 (24.4)                 | 5,437 (20.6)                 | 2556 (23.1)             | 834 (23.5)          |
| $\geq 90$ years                                         | 1,198 (6.8)                  | 1,323 (5.0)                  | 440 (4.0)               | 193 (5.4)           |
| Male sex, n (%)                                         | 7,689 (43.6)                 | 12,431 (47.0)                | 5614 (50.7)             | 1796 (50.6)         |
| Self-reported race <sup>†</sup> , n (%)                 |                              |                              |                         |                     |
| White/Branca                                            | 13,415 (76.1)                | 19,796 (74.9)                | 9051 (81.7)             | 2882 (81.2)         |
| Brown/Pardo                                             | 3,192 (18.1)                 | 4,983 (18.9)                 | 1747 (15.8)             | 538 (15.2)          |
| Black/Preta                                             | 785 (4.5)                    | 1,258 (4.8)                  | 242 (2.2)               | 97 (2.7)            |
| Yellow/ Amarela                                         | 226 (1.3)                    | 390 (1.5)                    | 35 (0.3)                | 32 (0.9)            |
| Indigenous/Indigena                                     | 4 (0.0)                      | 6 (0.0)                      | -                       | -                   |
| Residence in "Grande São Paulo"<br>Health Region, n (%) | 12,381 (70.3)                | 16,538 (62.6)                | 3242 (29.3)             | 1441 (40.6)         |
| <b>Comorbidities</b>                                    |                              |                              |                         |                     |
| Reported number <sup>‡</sup> , n (%)                    |                              |                              |                         |                     |
| None                                                    | 10,027 (56.9)                | 12,668 (47.9)                | 6078 (54.9)             | 910 (25.6)          |
| One or two                                              | 6,984 (39.6)                 | 12,548 (47.5)                | 4557 (41.1)             | 2273 (64.0)         |
| Three or more                                           | 611 (3.5)                    | 1,217 (4.6)                  | 440 (4.0)               | 366 (10.3)          |
| Cardiovascular disease, n (%)                           | 5,293 (30.0)                 | 10,079 (38.1)                | 3367 (30.4)             | 1986 (56.0)         |
| Diabetes, n (%)                                         | 3,233 (18.3)                 | 6,533 (24.7)                 | 2183 (19.7)             | 1313 (37.0)         |
| <b>Prior SARS-CoV-2 exposure</b> <sup>**</sup>          |                              |                              |                         |                     |

|                                                                             |                     |                      |                  |                    |
|-----------------------------------------------------------------------------|---------------------|----------------------|------------------|--------------------|
| Previous symptomatic events notified to the surveillance systems**, n (%)   | 685 (3.9)           | 354 (1.3)            | 8 (0.1)          | 8 (0.2)            |
| Positive SARS-CoV-2 test result <sup>††</sup> , n (%)                       | 66 (0.4)            | 13 (0.0)             | 0 (0.0)          | 1 (0.0)            |
| Interval between symptoms onset and RT-PCR testing, median (p25-p75), days  | 3 [2-5]             | 4 [2-6]              | 3 [1-5]          | 4 [2-6]            |
| <b>Hospitalisations, n (%)</b>                                              | 4,524/17,484 (25.9) | 12,987/26,221 (49.5) | 645/2,035 (31.7) | 1,939/2,025 (95.8) |
| <b>Deaths, n (%)</b>                                                        | 1,594/16,710 (9.5)  | 7,054/24,508 (28.8)  | 255/1,940 (13.1) | 2,052/2,052 (100)  |
| Interval between symptoms onset and hospitalization, median (p25-p75), days | 3 [2-6]             | 7 [4-10]             | 4 [2-7]          | 7 [4-10]           |
| Interval between symptoms onset and deaths, median (p25-p75), days          | 8 [4-13]            | 14 [9-21]            | 8 [4-15]         | 15 [10-22]         |
| <b>Vaccination status</b>                                                   |                     |                      |                  |                    |
| Not vaccinated, n (%)                                                       | 11,986 (68.0)       | 17,233 (65.2)        | 7022 (63.4)      | 2373 (66.9)        |
| Single dose, within 0-13 days, n (%)                                        | 1,446 (8.2)         | 2,976 (11.3)         | 1430 (12.9)      | 455 (12.8)         |
| Single dose, ≥14 days, n (%)                                                | 1,797 (10.2)        | 3,312 (12.5)         | 1305 (11.8)      | 414 (11.7)         |
| Two doses, within 0-13 days, n (%)                                          | 1,041 (5.9)         | 1,533 (5.8)          | 648 (5.9)        | 159 (4.5)          |
| Two doses, ≥14 days, n (%)                                                  | 1,352 (7.7)         | 1,379 (5.2)          | 670 (6.0)        | 148 (4.2)          |
| Interval between first and second dose, mean (SD), days                     | 25 (6)              | 30 (12)              | 25 (7)           | 23 (5)             |
| Interval between first dose and RT-PCR testing, mean (SD), days             | 28 (19)             | 23 (16)              | 23 (17)          | 21 (16)            |
| Interval between second dose and RT-PCR testing, mean (SD), days            | 20 (15)             | 17 (14)              | 18 (15)          | 18 (14)            |

\*Continuous variables are displayed as mean (SD); categorical variables are displayed as n (%).

<sup>^</sup>These numbers refer to RT-PCR tests and represent 43,774 individuals for the eligible cases and controls and 8,581 individuals in the matched cases and controls.

<sup>†</sup>Race/skin colour as defined by the Brazilian national census bureau (Instituto Nacional de Geografia e Estatísticas).

<sup>‡</sup>Comorbidities included: cardiovascular, renal, neurological, haematological, or hepatic comorbidities, diabetes, chronic respiratory disorder, obesity, or immunosuppression.

<sup>\*\*</sup>Prior to the start of the study on 17 January, 2021 and after systematic surveillance was implemented on 1 February, 2020.

<sup>\*\*</sup> Reported illness with COVID-19 associated symptoms in the eSUS and SIVEP-Gripe databases.

<sup>††</sup> Defined as a positive SARS-CoV-2 RT-PCR or antigen detection test result.

Supplementary Table 5. Sensitivity analysis for the bias indicator period expanding from 0-13 days to 0-6 and 7-13 days after first dose

|                                                        | Bias indicator 0-13 days after first dose |                   |          |                                                 | Bias indicator 0-6 / 7-13 days after first dose |                    |          |
|--------------------------------------------------------|-------------------------------------------|-------------------|----------|-------------------------------------------------|-------------------------------------------------|--------------------|----------|
|                                                        | OR (95% CI)^                              | VE (95% CI)^      | p-value^ |                                                 | OR (95% CI)^                                    | VE (95% CI)^       | p-value^ |
| <b>Symptomatic COVID-19 (n=55,519)</b>                 |                                           |                   |          |                                                 |                                                 |                    |          |
| Single dose, within 0-13 days vs. unvaccinated*        | 1.01 (0.93-1.09)                          | -0.8% (-9.4-7.2)  | 0.86     | Single dose, within 0-6 days vs. unvaccinated*  | 0.88 (0.79-0.99)                                | 11.6% (1.5-20.7)   | 0.03     |
|                                                        |                                           |                   |          | Single dose, within 7-13 days vs. unvaccinated* | 1.13 (1.02-1.25)                                | -12.9% (-25--2)    | 0.02     |
| <b>COVID-19 associated hospitalisations (n=30,308)</b> |                                           |                   |          |                                                 |                                                 |                    |          |
| Single dose, within 0-13 days vs. unvaccinated*        | 0.93 (0.84-1.04)                          | 6.6% (-4.3-16.3)  | 0.23     | Single dose, within 0-6 days vs. unvaccinated*  | 0.76 (0.66-0.89)                                | 23.7% (11.4-34.3)  | <0.001   |
|                                                        |                                           |                   |          | Single dose, within 7-13 days vs. unvaccinated* | 1.10 (0.96-1.26)                                | -10.1% (-25.9-3.7) | 0.16     |
| <b>COVID-19 associated deaths (n=14,624)</b>           |                                           |                   |          |                                                 |                                                 |                    |          |
| Single dose, within 0-13 days vs. unvaccinated*        | 0.87 (0.74-1.02)                          | 13.1% (-1.5-25.6) | 0.08     | Single dose, within 0-6 days vs. unvaccinated*  | 0.75 (0.61-0.93)                                | 24.6% (7-38.9)     | 0.008    |
|                                                        |                                           |                   |          | Single dose, within 7-13 days vs. unvaccinated* | 0.98 (0.81-1.18)                                | 2.4% (-18-19.3)    | 0.80     |

\*At date of index sample collection for cases and controls.

^ Models adjusted by age (linear term for symptomatic and restricted cubic spline for hospitalisation and deaths) and number of comorbidities (None, One or Two, Three or more)

Supplementary Table 6. **Adjusted effectiveness of CoronaVac during the period  $\geq 14$  days after the second CoronaVac dose for subgroups of adults  $\geq 70$  years of age.**

| Outcome                                    | OR (95% CI)      | VE (95% CI)       | p-value for interaction |
|--------------------------------------------|------------------|-------------------|-------------------------|
| <b>Symptomatic COVID-19<br/>(n=55,519)</b> |                  |                   |                         |
| 70-74 (n=29,824)                           | 0.41 (0.30-0.56) | 59.0% (43.7-70.2) | 0.007                   |
| 75-79 (n=14,853)                           | 0.44 (0.34-0.57) | 56.2% (43.0-66.3) |                         |
| 80+ (n=10,842)                             | 0.67 (0.55-0.83) | 32.7% (17.0-45.5) |                         |
| <b>Hospitalisations<br/>(n=30,308)</b>     |                  |                   |                         |
| 70-74 (n=14,402)                           | 0.22 (0.13-0.38) | 77.6% (62.5-86.7) | <0.001                  |
| 75-79 (n=8,428)                            | 0.33 (0.23-0.48) | 66.6% (51.8-76.9) |                         |
| 80+ (n=7,478)                              | 0.61 (0.48-0.79) | 38.9% (21.4-52.5) |                         |
| <b>Deaths (n=14,624)</b>                   |                  |                   |                         |
| 70-74 (n=6,408)                            | 0.16 (0.06-0.41) | 83.9% (59.2-93.7) | 0.001                   |
| 75-79 (n=4,193)                            | 0.22 (0.12-0.41) | 78.0% (58.8-88.3) |                         |
| 80+ (n=4,023)                              | 0.56 (0.39-0.80) | 44.0% (20.3-60.6) |                         |

Estimates of vaccine effectiveness were obtained from a conditional logistic regression model that included covariates of age and the number of comorbidities and incorporated an interaction term between the category of interest and the period  $\geq 14$  days after the second CoronaVac dose.

Supplementary Table 7. **Adjusted effectiveness of CoronaVac against symptomatic COVID-19  $\geq 14$  days after the second dose, in subgroups of adults  $\geq 70$  years of age.**

| Subgroup                          | Adjusted OR (95% CI) | Adjusted VE (95% CI) | p-value for interaction |
|-----------------------------------|----------------------|----------------------|-------------------------|
| <b>Age</b>                        |                      |                      |                         |
| 70-74 (n=29,824)                  | 0.41 (0.30-0.56)     | 59.0% (43.7-70.2)    | 0.007                   |
| 75-79 (n=14,853)                  | 0.44 (0.34-0.57)     | 56.2% (43.0-66.3)    |                         |
| 80+ (n=10,842)                    | 0.67 (0.55-0.83)     | 32.7% (17.0-45.5)    |                         |
| <b>Sex</b>                        |                      |                      |                         |
| Females (n=30,990)                | 0.54 (0.449-0.651)   | 46.0% (34.9-55.1)    | 0.37                    |
| Males (n=24,529)                  | 0.52 (0.418-0.647)   | 48.0% (35.3-58.2)    |                         |
| <b>Comorbidities</b>              |                      |                      |                         |
| No reported (n=29,847)            | 0.54 (0.45-0.65)     | 46.1% (35.1-55.2)    | 0.85                    |
| Reported (n=25,672)               | 0.53 (0.45-0.62)     | 47.4% (37.9-55.4)    |                         |
| <b>Cardiovascular disease</b>     |                      |                      |                         |
| No reported (n=37,474)            | 0.53 (0.45-0.63)     | 46.9% (37.3-55.1)    | 0.93                    |
| Reported (n=18,045)               | 0.54 (0.44-0.64)     | 46.5% (35.6-55.6)    |                         |
| <b>Diabetes</b>                   |                      |                      |                         |
| No reported (n=43,672)            | 0.50 (0.42-0.58)     | 50.5% (42.3-57.6)    | 0.008                   |
| Reported (n=11,847)               | 0.67 (0.54-0.85)     | 32.6% (15.5-46.3)    |                         |
| <b>Health regional area</b>       |                      |                      |                         |
| “Grande São Paulo” (n=35,038)     | 0.50 (0.42-0.59)     | 50.2% (41.2-57.9)    | 0.31                    |
| Not “Grande São Paulo” (n=20,481) | 0.64 (0.49-0.83)     | 36.2% (16.6-51.2)    |                         |

All models are adjusted by age (continuous) and number of comorbidities, and include an interaction term between the subgroup of interest and vaccinations with 2 doses,  $\geq 14$  days after second vaccine dose.

Supplementary Figure 4. **Adjusted effectiveness of CoronaVac against symptomatic COVID-19  $\geq 14$  days after the second CoronaVac dose for other subgroups of adults  $\geq 70$  years of age.**

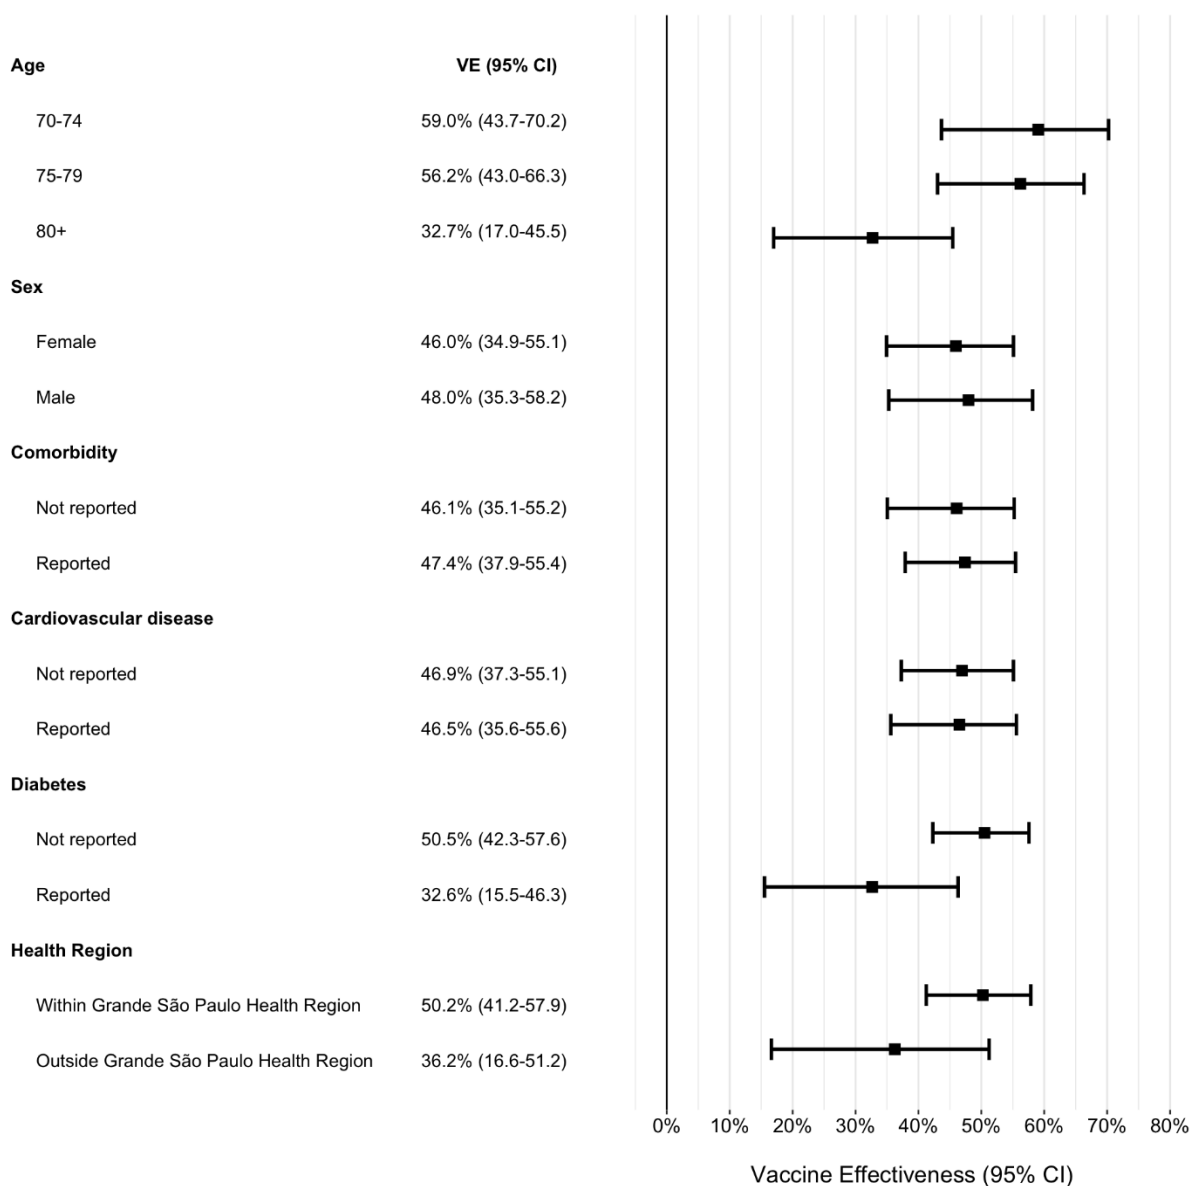

Estimates of vaccine effectiveness were obtained from a conditional logistic regression model that included covariates of age (continuous) and the number of comorbidities and incorporated an interaction term between the category of interest and the period  $\geq 14$  days after the second CoronaVac dose.

Supplementary Table 8. Detailed description of **effectiveness of CoronaVac against the composite outcome hospitalisations or deaths in adults  $\geq 70$  years of age**

| COVID-19 associated hospitalizations or deaths<br>(n=30,944) | Unadjusted Analysis |                   |         | Adjusted Analysis <sup>^</sup> |                   |         |
|--------------------------------------------------------------|---------------------|-------------------|---------|--------------------------------|-------------------|---------|
|                                                              | OR (95% CI)         | VE (95% CI)       | p-value | OR (95% CI)                    | VE (95% CI)       | p-value |
| Single dose, within 0-13 days vs. unvaccinated*              | 0.98 (0.88-1.09)    | 2.1% (-8.6-11.8)  | 0.69    | 0.93 (0.84-1.04)               | 6.7% (-4-16.3)    | 0.21    |
| Single dose, $\geq 14$ days vs. unvaccinated*                | 0.87 (0.77-0.98)    | 13.3% (2.2-23.1)  | 0.02    | 0.83 (0.73-0.94)               | 17.5% (6.5-27.3)  | 0.003   |
| Two doses, within 0-13 days vs. unvaccinated*                | 0.65 (0.56-0.76)    | 34.8% (23.7-44.3) | <0.001  | 0.61 (0.52-0.72)               | 39.2% (28.3-48.4) | <0.001  |
| Two doses, $\geq 14$ days vs. unvaccinated*                  | 0.48 (0.40-0.57)    | 51.9% (42.8-59.6) | <0.001  | 0.45 (0.37-0.54)               | 55.4% (46.5-62.8) | <0.001  |

<sup>^</sup>Adjusted for age (continuous) and the number of comorbidities.



Supplementary Table 9. General characteristics of the matched sample according to main and sensitivity analyses.

| Characteristics*                                                          | Main Analysis<br>(1:5, unbalanced, with replacement) |                     | Sensitivity Analysis 1<br>(1:1 without replacement) |                    | Sensitivity Analysis 2<br>(1:1 with replacement) |                     | Sensitivity Analysis 3<br>(1:2 with replacement) |                    |
|---------------------------------------------------------------------------|------------------------------------------------------|---------------------|-----------------------------------------------------|--------------------|--------------------------------------------------|---------------------|--------------------------------------------------|--------------------|
|                                                                           | Controls<br>(n=42,236)                               | Cases<br>(n=13,283) | Controls<br>(n=7,950)                               | Cases<br>(n=7,950) | Controls<br>(n=13,283)                           | Cases<br>(n=13,283) | Controls<br>(n=18,804)                           | Cases<br>(n=9,402) |
| <b>Demographics</b>                                                       |                                                      |                     |                                                     |                    |                                                  |                     |                                                  |                    |
| Age, mean (SD), years                                                     | 75.69 (5.44)                                         | 75.90 (5.64)        | 76.15 (5.8)                                         | 76.15 (5.8)        | 75.92 (5.67)                                     | 75.90 (5.64)        | 75.77 (5.56)                                     | 75.78 (5.52)       |
| Age categories, n (%)                                                     |                                                      |                     |                                                     |                    |                                                  |                     |                                                  |                    |
| 70-79 years                                                               | 34134 (80.8)                                         | 10543 (79.4)        | 6,150 (77.4)                                        | 6,150 (77.4)       | 10543 (79.4)                                     | 10543 (79.4)        | 15064 (80.1)                                     | 7532 (80.1)        |
| 80-89 years                                                               | 7045 (16.7)                                          | 2311 (17.4)         | 1,510 (19.0)                                        | 1,510 (19.0)       | 2311 (17.4)                                      | 2311 (17.4)         | 3200 (17.0)                                      | 1600 (17.0)        |
| ≥90 years                                                                 | 1057 (2.5)                                           | 429 (3.2)           | 290 (3.6)                                           | 290 (3.6)          | 429 (3.2)                                        | 429 (3.2)           | 540 (2.9)                                        | 270 (2.9)          |
| Male sex, n (%)                                                           | 18610 (44.1)                                         | 5919 (44.6)         | 3,276 (41.2)                                        | 3,276 (41.2)       | 5919 (44.6)                                      | 5919 (44.6)         | 8258 (43.9)                                      | 4129 (43.9)        |
| Self-reported race <sup>†</sup> , n (%)                                   |                                                      |                     |                                                     |                    |                                                  |                     |                                                  |                    |
| White/Branca                                                              | 34603 (81.9)                                         | 10803 (81.3)        | 6,420 (80.8)                                        | 6,420 (80.8)       | 10803 (81.3)                                     | 10803 (81.3)        | 15460 (82.2)                                     | 7730 (82.2)        |
| Brown/Pardo                                                               | 6797 (16.1)                                          | 2115 (15.9)         | 1,301 (16.4)                                        | 1,301 (16.4)       | 2115 (15.9)                                      | 2115 (15.9)         | 2970 (15.8)                                      | 1485 (15.8)        |
| Black/Preta                                                               | 727 (1.7)                                            | 287 (2.2)           | 191 (2.4)                                           | 191 (2.4)          | 287 (2.2)                                        | 287 (2.2)           | 338 (1.8)                                        | 169 (1.8)          |
| Yellow/ Amarela                                                           | 109 (0.3)                                            | 78 (0.6)            | 38 (0.5)                                            | 38 (0.5)           | 78 (0.6)                                         | 78 (0.6)            | 36 (0.2)                                         | 18 (0.2)           |
| Indigenous/Indigena                                                       | -                                                    | -                   | -                                                   | -                  | -                                                | -                   | -                                                | -                  |
| Residence in “Grande São Paulo” Health Region, n (%)                      | 14368 (34.0)                                         | 6113 (46.0)         | 4,259 (53.6)                                        | 4,259 (53.6)       | 6113 (46.0)                                      | 6113 (46.0)         | 6752 (35.9)                                      | 3376 (35.9)        |
| <b>Comorbidities</b>                                                      |                                                      |                     |                                                     |                    |                                                  |                     |                                                  |                    |
| Reported number <sup>‡</sup> , n (%)                                      |                                                      |                     |                                                     |                    |                                                  |                     |                                                  |                    |
| None                                                                      | 23961 (56.7)                                         | 5886 (44.3)         | 4,510 (56.7)                                        | 3,564 (44.8)       | 7574 (57.0)                                      | 5886 (44.3)         | 10621 (56.5)                                     | 4090 (43.5)        |
| One or two                                                                | 16626 (39.4)                                         | 6713 (50.5)         | 3,151 (39.6)                                        | 3,994 (50.2)       | 5267 (39.7)                                      | 6713 (50.5)         | 7453 (39.6)                                      | 4781 (50.9)        |
| Three or more                                                             | 1649 (3.9)                                           | 684 (5.1)           | 289 (3.6)                                           | 392 (4.9)          | 442 (3.3)                                        | 684 (5.1)           | 730 (3.9)                                        | 531 (5.6)          |
| Cardiovascular disease, n (%)                                             | 12563 (29.7)                                         | 5482 (41.3)         | 2,375 (29.9)                                        | 3,252 (40.9)       | 3861 (29.1)                                      | 5482 (41.3)         | 5646 (30.0)                                      | 3955 (42.1)        |
| Diabetes, n (%)                                                           | 8269 (19.6)                                          | 3578 (26.9)         | 1,314 (19.0)                                        | 2,092 (26.3)       | 2518 (19.0)                                      | 3578 (26.9)         | 3655 (19.4)                                      | 2601 (27.7)        |
| <b>Prior SARS-CoV-2 exposure**</b>                                        |                                                      |                     |                                                     |                    |                                                  |                     |                                                  |                    |
| Previous symptomatic events notified to the surveillance systems**, n (%) | 47 (0.1)                                             | 37 (0.3)            | 35 (0.4)                                            | 35 (0.4)           | 37 (0.3)                                         | 37 (0.3)            | 14 (0.1)                                         | 7 (0.1)            |

|                                                                             |                      |                     |                    |                    |                     |                     |                     |                    |
|-----------------------------------------------------------------------------|----------------------|---------------------|--------------------|--------------------|---------------------|---------------------|---------------------|--------------------|
| Positive SARS-CoV-2 test result <sup>††</sup> , n (%)                       | 1 (0.0)              | 4 (0.0)             | 1 (0.0)            | 4 (0.1)            | 1 (0.0)             | 4 (0.0)             | -                   | -                  |
| Interval between symptoms onset and RT-PCR testing, median (p25-p75), days  | 3 [1-5]              | 4 [2-6]             | 3 [1-5]            | 4 [2-6]            | 3 [2-5]             | 4 [2-6]             | 3 [1-5]             | 4 [2-6]            |
| <b>Hospitalisations, n (%)</b>                                              | 11,020/41,980 (26.3) | 7,043/13,175 (53.5) | 2,065/7,889 (26.2) | 4,039/7,883 (51.2) | 3,488/13,196 (26.4) | 7,043/13,175 (53.5) | 4,923/18,704 (26.3) | 5,171/9,330 (55.4) |
| <b>Deaths, n (%)</b>                                                        | 4,072/40,134 (10.1)  | 3,549/12,251 (29.0) | 729/7,557 (9.6)    | 2,052/7,359 (27.9) | 1,301/12,630 (10.3) | 3,549/12,251 (29.0) | 1,790/17,873 (10.0) | 2,491/8,607 (28.9) |
| Interval between symptoms onset and hospitalization, median (p25-p75), days | 4 [2-7]              | 7[4-10]             | 3 [2-6]            | 7 [4-10]           | 3 [2-6]             | 7 [4-10]            | 4 [2-7]             | 7 [4-11]           |
| Interval between symptoms onset and deaths, median (p25-p75), days          | 8 [4-16]             | 15 [10-22]          | 8 [4-15]           | 15 [10-22]         | 8 [4-16]            | 15 [10-22]          | 8 [4-16]            | 16 [10-23]         |
| <b>Vaccination status</b>                                                   |                      |                     |                    |                    |                     |                     |                     |                    |
| Not vaccinated, n (%)                                                       | 27994 (66.3)         | 8989 (67.7)         | 5,485 (69.0)       | 5,561 (69.9)       | 8817 (66.4)         | 8989 (67.7)         | 12586 (66.9)        | 6378 (67.8)        |
| Single dose, within 0-13 days, n (%)                                        | 4873 (11.5)          | 1565 (11.8)         | 747 (9.4)          | 762 (9.6)          | 1515 (11.4)         | 1565 (11.8)         | 2106 (11.2)         | 1138 (12.1)        |
| Single dose, ≥14 days, n (%)                                                | 4631 (11.0)          | 1489 (11.2)         | 843 (10.6)         | 851 (10.7)         | 1457 (11.0)         | 1489 (11.2)         | 2005 (10.7)         | 1003 (10.7)        |
| Two doses, within 0-13 days, n (%)                                          | 2445 (5.8)           | 700 (5.3)           | 437 (5.5)          | 421 (5.3)          | 782 (5.9)           | 700 (5.3)           | 1063 (5.7)          | 493 (5.2)          |
| Two doses, ≥14 days, n (%)                                                  | 2293 (5.4)           | 540 (4.1)           | 438 (5.5)          | 355 (4.5)          | 712 (5.4)           | 540 (4.1)           | 1044 (5.6)          | 390 (4.1)          |
| Interval between first and second dose, mean (SD), days                     | 25 (6)               | 30 (12)             | 25 (6)             | 29 (11)            | 25 (6)              | 30 (12)             | 25 (7)              | 30 (12)            |
| Interval between first dose and RT-PCR testing, mean (SD), days             | 22 (17)              | 21 (16)             | 24 (17)            | 23 (16)            | 23 (16)             | 21 (16)             | 23 (17)             | 21 (16)            |
| Interval between second dose and RT-PCR testing, mean (SD), days            | 17 (14)              | 16 (14)             | 18 (15)            | 17 (14)            | 17 (14)             | 16 (14)             | 17 (14)             | 17 (14)            |

\*Continuous variables are displayed as mean (SD); categorical variables are displayed as n (%).

<sup>†</sup>Race/skin colour as defined by the Brazilian national census bureau (Instituto Nacional de Geografia e Estatísticas).

<sup>‡</sup>Comorbidities included: cardiovascular, renal, neurological, haematological, or hepatic comorbidities, diabetes, chronic respiratory disorder, obesity, or immunosuppression.

<sup>\*\*</sup>Prior to the start of the study on 17 January, 2021 and after systematic surveillance was implemented on 1 February, 2020.

<sup>\*\*</sup> Reported illness with COVID-19 associated symptoms in the eSUS and SIVEP-Gripe databases.

<sup>††</sup> Defined as a positive SARS-CoV-2 RT-PCR or antigen detection test result.

Supplementary Table 10. Summary of effectiveness of CoronaVac against symptomatic COVID-19 of the main analysis and three sensitivity analyses for the matching procedure

|                                                           | Main analysis<br>(1:5, unbalanced, with<br>replacement)                                                                     | Sensitivity Analysis 1<br>(1:1 without<br>replacement)                          | Sensitivity Analysis 2<br>(1:1 with replacement)                                | Sensitivity Analysis 3<br>(1:2 with replacement)                                |
|-----------------------------------------------------------|-----------------------------------------------------------------------------------------------------------------------------|---------------------------------------------------------------------------------|---------------------------------------------------------------------------------|---------------------------------------------------------------------------------|
| <b>Characteristics</b>                                    |                                                                                                                             |                                                                                 |                                                                                 |                                                                                 |
| Matching                                                  | Age 5 years, sex, self-reported race, municipality, $\pm 3$ days of RT-PCR test                                             | Age 5 years, sex, self-reported race, municipality, $\pm 3$ days of RT-PCR test | Age 5 years, sex, self-reported race, municipality, $\pm 3$ days of RT-PCR test | Age 5 years, sex, self-reported race, municipality, $\pm 3$ days of RT-PCR test |
| Cases:Controls                                            | 1:5                                                                                                                         | 1:1                                                                             | 1:1                                                                             | 1:2                                                                             |
| Replace                                                   | Yes                                                                                                                         | No                                                                              | Yes                                                                             | Yes                                                                             |
| N total                                                   | 55,519                                                                                                                      | 15,900                                                                          | 26,566                                                                          | 28,206                                                                          |
| N cases included                                          | 13,283 (50%)                                                                                                                | 7,950 (30%)                                                                     | 13,283 (50%)                                                                    | 9,402 (36%)                                                                     |
| N individuals                                             | 13,283 as cases / 8,912 as controls                                                                                         | 7,950 as cases / 7,912 as controls                                              | 13,283 as cases / 6,936 as controls                                             | 9,402 as cases / 6,330 as controls                                              |
| N pairs                                                   | 1:1 control (n=3,881)<br>1:2 controls (n=1,963)<br>1:3 controls (n=1,044)<br>1:4 controls (n=678)<br>1:5 controls (n=5,717) | 1:1 control (n=7,950)                                                           | 1:1 control (n=13,283)                                                          | 1:2 controls (n=9,402)                                                          |
| N discordant pairs                                        | 2,934                                                                                                                       | 1,999                                                                           | 3,749                                                                           | 2,172                                                                           |
| N discordant pairs second dose x unvaccinated             | 264                                                                                                                         | 143                                                                             | 258                                                                             | 187                                                                             |
|                                                           |                                                                                                                             |                                                                                 |                                                                                 |                                                                                 |
| <b>Adjusted VE, Symptomatic disease</b>                   |                                                                                                                             |                                                                                 |                                                                                 |                                                                                 |
| Single dose, within 0-13 days vs. unvaccinated            | -0.8% (-9.4-7.2)                                                                                                            | 2.5% (-12.2-15.3)                                                               | 2% (-8.3-11.4)                                                                  | -4.9% (-16-5.2)                                                                 |
| Single dose, $\geq 14$ days vs. unvaccinated              | 12.5% (3.7-20.6)                                                                                                            | 10.5% (-4.4-23.3)                                                               | 12.8% (2.1-22.4)                                                                | 13.9% (2.8-23.7)                                                                |
| Two doses, within 0-13 days vs. unvaccinated              | 24.7% (14.7-33.4)                                                                                                           | 18.2% (0.0-33.2)                                                                | 29.6% (18.4-39.3)                                                               | 25.2% (13-35.7)                                                                 |
| Two doses, $\geq 14$ days vs. unvaccinated                | 46.8% (38.7-53.8)                                                                                                           | 41.6% (26.9-53.3)                                                               | 48.6% (38.9-56.8)                                                               | 47.8% (38.2-56)                                                                 |
|                                                           |                                                                                                                             |                                                                                 |                                                                                 |                                                                                 |
| Age subgroups, Two doses, $\geq 14$ days vs. unvaccinated |                                                                                                                             |                                                                                 |                                                                                 |                                                                                 |
| 70-74                                                     | 59.0% (43.7-70.2)                                                                                                           | 61.8% (34.8-77.7)                                                               | 64.9% (49.4-75.7)                                                               | 59.9% (42.0-72.3)                                                               |
| 75-79                                                     | 56.2% (43.0-66.3)                                                                                                           | 48.9% (23.3-66.0)                                                               | 53.6% (35.9-66.4)                                                               | 55.5% (38.9-67.6)                                                               |
| 80+                                                       | 32.7% (17.0-45.5)                                                                                                           | 28.0% (0.60-47.9)                                                               | 33.9% (15.0-48.6)                                                               | 35.0% (16.0-49.7)                                                               |
| p-value for interaction                                   | 0.007                                                                                                                       | 0.050                                                                           | 0.022                                                                           | 0.021                                                                           |

Supplementary Table 11. Detailed description of **effectiveness of CoronaVac against symptomatic COVID-19, hospitalisations and deaths in adults ≥70 years of age in the Sensitivity Analysis 1, 1:1 without replacement**

| Symptomatic COVID-19 (n=15,900)                       | Unadjusted Analysis |                   |         | Adjusted Analysis <sup>^</sup> |                   |         |
|-------------------------------------------------------|---------------------|-------------------|---------|--------------------------------|-------------------|---------|
|                                                       | OR (95% CI)         | VE (95% CI)       | p-value | OR (95% CI)                    | VE (95% CI)       | p-value |
| Single dose, within 0-13 days vs. unvaccinated*       | 0.97 (0.85-1.12)    | 2.7% (-11.7-15.3) | 0.70    | 0.98 (0.85-1.12)               | 2.5% (-12.2-15.3) | 0.72    |
| Single dose, ≥14 days vs. unvaccinated*               | 0.91 (0.78-1.05)    | 9.5% (-5.3-22.3)  | 0.20    | 0.90 (0.77-1.04)               | 10.5% (-4.4-23.3) | 0.16    |
| Two doses, within 0-13 days vs. unvaccinated*         | 0.81 (0.66-0.98)    | 19.5% (1.9-34.0)  | 0.03    | 0.82 (0.67-1.00)               | 18.2% (0.0-33.2)  | 0.05    |
| Two doses, ≥14 days vs. unvaccinated*                 | 0.60 (0.48-0.74)    | 40.5% (25.8-52.3) | <0.001  | 0.58 (0.47-0.73)               | 41.6% (26.9-53.3) | <0.001  |
| <b>COVID-19 associated hospitalisations (n=8,078)</b> |                     |                   |         |                                |                   |         |
| Single dose, within 0-13 days vs. unvaccinated*       | 0.89 (0.74-1.07)    | 11.3% (-7.0-26.4) | 0.21    | 0.84 (0.68-1.02)               | 16.4% (-2.2-31.6) | 0.08    |
| Single dose, ≥14 days vs. unvaccinated*               | 0.85 (0.70-1.04)    | 14.6% (-4.2-30.0) | 0.12    | 0.83 (0.66-1.01)               | 18.5% (-1.0-34.2) | 0.06    |
| Two doses, within 0-13 days vs. unvaccinated*         | 0.62 (0.47-0.81)    | 38.1% (18.8-52.8) | 0.001   | 0.59 (0.44-0.79)               | 40.9% (20.7-55.9) | <0.001  |
| Two doses, ≥14 days vs. unvaccinated*                 | 0.47 (0.36-0.63)    | 52.7% (37.2-64.4) | <0.001  | 0.41 (0.30-0.56)               | 59% (44.2-69.8)   | <0.001  |
| <b>COVID-19 associated deaths (n=4,104)</b>           |                     |                   |         |                                |                   |         |
| Single dose, within 0-13 days vs. unvaccinated*       | 0.92 (0.72-1.18)    | 8.2% (-17.7-28.4) | 0.50    | 0.93 (0.71-1.21)               | 7.4% (-21.3-29.2) | 0.58    |
| Single dose, ≥14 days vs. unvaccinated*               | 0.76 (0.57-1.00)    | 24.5% (0.0-43.0)  | 0.05    | 0.68 (0.50-0.93)               | 31.6% (7.1-49.7)  | 0.02    |
| Two doses, within 0-13 days vs. unvaccinated*         | 0.40 (0.27-0.59)    | 60.4% (40.6-73.5) | <0.001  | 0.36 (0.23-0.55)               | 64.4% (44.6-77.1) | <0.001  |
| Two doses, ≥14 days vs. unvaccinated*                 | 0.34 (0.22-0.52)    | 66.2% (47.8-78.1) | <0.001  | 0.29 (0.18-0.46)               | 71.4% (53.7-82.3) | <0.001  |

\*At date of index sample collection for cases and controls.

<sup>^</sup> Models adjusted by age and number of comorbidities (None, One or Two, Three or more)

Supplementary Table 12. Detailed description of **effectiveness of CoronaVac against symptomatic COVID-19, hospitalisations and deaths in adults ≥70 years of age in the Sensitivity Analysis 2, 1:1 with replacement**

| Symptomatic COVID-19 (n=26,566)                        | Unadjusted Analysis |                   |         | Adjusted Analysis <sup>^</sup> |                   |         |
|--------------------------------------------------------|---------------------|-------------------|---------|--------------------------------|-------------------|---------|
|                                                        | OR (95% CI)         | VE (95% CI)       | p-value | OR (95% CI)                    | VE (95% CI)       | p-value |
| Single dose, within 0-13 days vs. unvaccinated*        | 0.98 (0.89-1.08)    | 1.9% (-8.3-11.1)  | 0.71    | 0.98 (0.886-1.08)              | 2% (-8.3-11.4)    | 0.69    |
| Single dose, ≥14 days vs. unvaccinated*                | 0.89 (0.79-0.99)    | 11.4% (0.8-21)    | 0.04    | 0.87 (0.78-0.98)               | 12.8% (2.1-22.4)  | 0.02    |
| Two doses, within 0-13 days vs. unvaccinated*          | 0.71 (0.61-0.82)    | 29.2% (18.2-38.7) | <0.001  | 0.70 (0.61-0.82)               | 29.6% (18.4-39.3) | <0.001  |
| Two doses, ≥14 days vs. unvaccinated*                  | 0.52 (0.44-0.62)    | 48.1% (38.5-56.2) | <0.001  | 0.51 (0.43-0.61)               | 48.6% (38.9-56.8) | <0.001  |
| <b>COVID-19 associated hospitalisations (n=14,086)</b> |                     |                   |         |                                |                   |         |
| Single dose, within 0-13 days vs. unvaccinated*        | 0.95 (0.84-1.08)    | 4.9% (-8.1-16.4)  | 0.44    | 0.92 (0.80-1.06)               | 8.1% (-5.7-20)    | 0.24    |
| Single dose, ≥14 days vs. unvaccinated*                | 0.93 (0.80-1.08)    | 7% (-7.8-19.8)    | 0.34    | 0.86 (0.73-1.01)               | 14.4% (-0.5-27.1) | 0.06    |
| Two doses, within 0-13 days vs. unvaccinated*          | 0.63 (0.52-0.76)    | 37.4% (24.2-48.3) | <0.001  | 0.57 (0.46-0.70)               | 43.5% (30.4-54.1) | <0.001  |
| Two doses, ≥14 days vs. unvaccinated*                  | 0.46 (0.37-0.57)    | 54.3% (43.1-63.2) | <0.001  | 0.39 (0.31-0.59)               | 60.6% (50.1-68.8) | <0.001  |
| <b>COVID-19 associated deaths (n=7,098)</b>            |                     |                   |         |                                |                   |         |
| Single dose, within 0-13 days vs. unvaccinated*        | 0.85 (0.71-1.01)    | 15.3% (-1.1-29)   | 0.07    | 0.85 (0.70-1.03)               | 15.3% (-2.8-30.3) | 0.092   |
| Single dose, ≥14 days vs. unvaccinated*                | 0.77 (0.63-0.95)    | 22.9% (5.3-37.2)  | 0.01    | 0.67 (0.53-0.84)               | 33.1% (16.1-46.6) | 0.001   |
| Two doses, within 0-13 days vs. unvaccinated*          | 0.53 (0.40-0.70)    | 47.4% (30.5-60.2) | <0.001  | 0.45 (0.33-0.61)               | 55.2% (39.0-67.1) | <0.001  |
| Two doses, ≥14 days vs. unvaccinated*                  | 0.45 (0.33-0.62)    | 55% (38.3-67.2)   | <0.001  | 0.39 (0.28-0.55)               | 61% (44.9-72.4)   | <0.001  |

\*At date of index sample collection for cases and controls.

<sup>^</sup> Models adjusted by age and number of comorbidities (None, One or Two, Three or more)

Supplementary Table 13. Detailed description of **effectiveness of CoronaVac against symptomatic COVID-19, hospitalisations and deaths in adults ≥70 years of age in the Sensitivity Analysis 3, with replacement and 1:2 case-controls**

| Symptomatic COVID-19 (n=28,206)                        | Unadjusted Analysis |                    |         | Adjusted Analysis <sup>^</sup> |                   |         |
|--------------------------------------------------------|---------------------|--------------------|---------|--------------------------------|-------------------|---------|
|                                                        | OR (95% CI)         | VE (95% CI)        | p-value | OR (95% CI)                    | VE (95% CI)       | p-value |
| Single dose, within 0-13 days vs. unvaccinated*        | 1.06 (0.96-1.17)    | -5.7% (-16.7-4.3)  | 0.28    | 1.05 (0.95-1.16)               | -4.9% (-16-5.2)   | 0.36    |
| Single dose, ≥14 days vs. unvaccinated*                | 0.88 (0.78-0.99)    | 12% (0.9-21.9)     | 0.04    | 0.86 (0.76-0.97)               | 13.9% (2.8-23.7)  | 0.02    |
| Two doses, within 0-13 days vs. unvaccinated*          | 0.76 (0.65-0.88)    | 24.3% (12.2-34.8)  | <0.001  | 0.75 (0.64-0.87)               | 25.2% (13-35.7)   | <0.001  |
| Two doses, ≥14 days vs. unvaccinated*                  | 0.54 (0.46-0.64)    | 46.2% (36.3-54.5)  | <0.001  | 0.52 (0.44-0.62)               | 47.8% (38.2-56)   | <0.001  |
| <b>COVID-19 associated hospitalisations (n=10,342)</b> |                     |                    |         |                                |                   |         |
| Single dose, within 0-13 days vs. unvaccinated*        | 1.01 (0.89-1.15)    | -1.4% (-15.2-10.7) | 0.83    | 0.99 (0.86-1.13)               | 1.2% (-13.2-13.8) | 0.86    |
| Single dose, ≥14 days vs. unvaccinated*                | 0.87 (0.75-1.01)    | 13.3% (-0.8-25.4)  | 0.06    | 0.79 (0.68-0.93)               | 20.7% (6.9-32.5)  | 0.01    |
| Two doses, within 0-13 days vs. unvaccinated*          | 0.65 (0.54-0.79)    | 35.1% (21.4-46.4)  | <0.001  | 0.61 (0.50-0.75)               | 39.2% (25.5-50.4) | <0.001  |
| Two doses, ≥14 days vs. unvaccinated*                  | 0.51 (0.42-0.63)    | 48.8% (37.1-58.3)  | <0.001  | 0.46 (0.37-0.57)               | 54% (42.7-63)     | <0.001  |
| <b>COVID-19 associated deaths (n=4,982)</b>            |                     |                    |         |                                |                   |         |
| Single dose, within 0-13 days vs. unvaccinated*        | 1.00 (0.83-1.19)    | 0.2% (-19.4-16.7)  | 0.98    | 1.00 (0.83-1.22)               | -0.4% (-22-17.4)  | 0.97    |
| Single dose, ≥14 days vs. unvaccinated*                | 0.85 (0.68-1.04)    | 15.5% (-4.4-31.7)  | 0.12    | 0.79 (0.63-0.99)               | 21.3% (1.1-37.3)  | 0.04    |
| Two doses, within 0-13 days vs. unvaccinated*          | 0.67 (0.51-0.88)    | 33.2% (11.7-49.5)  | 0.005   | 0.64 (0.47-0.86)               | 36.3% (13.8-52.9) | 0.003   |
| Two doses, ≥14 days vs. unvaccinated*                  | 0.47 (0.34-0.65)    | 52.7% (35-65.6)    | <0.001  | 0.44 (0.31-0.61)               | 56.4% (38.8-69)   | <0.001  |

\*At date of index sample collection for cases and controls.

<sup>^</sup> Models adjusted by age and number of comorbidities (None, One or Two, Three or more)

Supplementary Table 14. **Adjusted effectiveness of CoronaVac during the period  $\geq 14$  days after the second CoronaVac dose for subgroups of adults  $\geq 70$  years of age in the Sensitivity Analysis 1, without replacement and 1:1 case-controls (original analysis in the protocol)**

| Outcome                             | OR (95% CI)      | VE (95% CI)       | p-value for interaction |
|-------------------------------------|------------------|-------------------|-------------------------|
| <b>Symptomatic cases (n=15,900)</b> |                  |                   |                         |
| 70-74 (n=8,178)                     | 0.38 (0.22-0.65) | 61.8% (34.8-77.7) | 0.05                    |
| 75-79 (n=4,122)                     | 0.51 (0.34-0.77) | 48.9% (23.3-66.0) |                         |
| 80+ (n=3,600)                       | 0.72 (0.52-0.99) | 28.0% (0.60-47.9) |                         |
| <b>Hospitalisations (n=8,078)</b>   |                  |                   |                         |
| 70-74 (n=3,596)                     | 0.20 (0.09-0.44) | 80.1% (55.7-91.0) | 0.04                    |
| 75-79 (n=2,098)                     | 0.31 (0.16-0.58) | 69.5% (42.4-83.8) |                         |
| 80+ (n=2,384)                       | 0.57 (0.38-0.85) | 43.4% (15.4-62.0) |                         |
| <b>Deaths (n=4,104)</b>             |                  |                   |                         |
| 70-74 (n=1,652)                     | 0.14 (0.04-0.50) | 86.0% (50.4-96.1) | 0.19                    |
| 75-79 (n=1,140)                     | 0.13 (0.04-0.40) | 87.1% (60.2-95.8) |                         |
| 80+ (n=1,312)                       | 0.50 (0.27-0.92) | 49.9% (8.1-72.7)  |                         |

Estimates of vaccine effectiveness were obtained from a conditional logistic regression model that included covariates of age and the number of comorbidities and incorporated an interaction term between the category of interest and the period  $\geq 14$  days after the second CoronaVac dose.

Supplementary Table 15. **Adjusted effectiveness of CoronaVac during the period  $\geq 14$  days after the second CoronaVac dose for subgroups of adults  $\geq 70$  years of age in the Sensitivity Analysis 1, with replacement and 1:1 case-controls**

| Outcome                                    | OR (95% CI)      | VE (95% CI)       | p-value for interaction |
|--------------------------------------------|------------------|-------------------|-------------------------|
| <b>Symptomatic COVID-19<br/>(n=26,566)</b> |                  |                   |                         |
| 70-74 (n=14,048)                           | 0.35 (0.24-0.51) | 64.9% (49.4-75.7) | 0.02                    |
| 75-79 (n=7,038)                            | 0.46 (0.34-0.64) | 53.6% (35.9-66.4) |                         |
| 80+ (n=5,480)                              | 0.66 (0.51-0.85) | 33.9% (15.0-48.6) |                         |
| <b>Hospitalisations<br/>(n=14,086)</b>     |                  |                   |                         |
| 70-74 (n=6,526)                            | 0.18 (0.10-0.32) | 82.1% (68.0-90.0) | <0.001                  |
| 75-79 (n=3,856)                            | 0.32 (0.20-0.52) | 67.7% (47.9-79.9) |                         |
| 80+ (n=3,704)                              | 0.56 (0.41-0.77) | 44.2% (23.5-59.2) |                         |
| <b>Deaths (n=7,098)</b>                    |                  |                   |                         |
| 70-74 (n=3,034)                            | 0.14 (0.05-0.38) | 86.0% (61.9-94.8) | 0.07                    |
| 75-79 (n=2,010)                            | 0.28 (0.13-0.63) | 71.9% (37.2-87.5) |                         |
| 80+ (n=2,054)                              | 0.55 (0.36-0.84) | 45.3% (15.9-64.4) |                         |

Estimates of vaccine effectiveness were obtained from a conditional logistic regression model that included covariates of age and the number of comorbidities and incorporated an interaction term between the category of interest and the period  $\geq 14$  days after the second CoronaVac dose.



Supplementary Table 16. **Adjusted effectiveness of CoronaVac during the period  $\geq 14$  days after the second CoronaVac dose for subgroups of adults  $\geq 70$  years of age in the Sensitivity Analysis 2, with replacement and 1:2 case-controls**

| Outcome                                | OR (95% CI)      | VE (95% CI)       | p-value for interaction |
|----------------------------------------|------------------|-------------------|-------------------------|
| <b>Symptomatic COVID-19 (n=28,206)</b> |                  |                   |                         |
| 70-74 (n=15,150)                       | 0.40 (0.28-0.58) | 59.9% (42.0-72.3) | 0.02                    |
| 75-79 (n=7,447)                        | 0.45 (0.32-0.61) | 55.5% (38.9-67.6) |                         |
| 80+ (n=5,610)                          | 0.65 (0.50-0.84) | 35.0% (16.0-49.7) |                         |
| <b>Hospitalisations (n=15,513)</b>     |                  |                   |                         |
| 70-74 (n=7,323)                        | 0.25 (0.14-0.44) | 74.9% (56.4-85.6) | 0.01                    |
| 75-79 (n=4,248)                        | 0.37 (0.24-0.56) | 63.4% (43.8-76.1) |                         |
| 80+ (n=3,942)                          | 0.66 (0.48-0.89) | 34.4% (10.9-51.7) |                         |
| <b>Deaths (n=7,473)</b>                |                  |                   |                         |
| 70-74 (n=3,267)                        | 0.11 (0.03-0.50) | 88.6% (49.6-97.4) | 0.01                    |
| 75-79 (n=2,094)                        | 0.22 (0.10-0.47) | 78.1% (52.7-89.8) |                         |
| 80+ (n=2,112)                          | 0.67 (0.43-1.03) | 33.2% (-3.0-56.6) |                         |

Estimates of vaccine effectiveness were obtained from a conditional logistic regression model that included covariates of age and the number of comorbidities and incorporated an interaction term between the category of interest and the period  $\geq 14$  days after the second CoronaVac dose.
